# Supplementary material
Source: PubMed Central journal article supplement (PMC7402202)
Supplement: NIHMS1536212-supplement-1.pdf [file NIHMS1536212-supplement-1.pdf]

Table 2. Clinical and Genetic Details of the Cohort.

| ID | Age onset (months) | Microcephaly | GMFCS | MACS | CFC S | Gene     | Mutation 1     | AminoAcid detail mutation 1 | Significance | Mutation 2    | AminoAcid detail mutation 2 | Significance | Age data collection |
|----|--------------------|--------------|-------|------|-------|----------|----------------|-----------------------------|--------------|---------------|-----------------------------|--------------|---------------------|
| 1  | NA                 | Y            | V     | V    | V     | TREX1    | c.635delC      | p. Thr212fs+2x              | p            | c.635delC     | p. Thr212fs+2x              | p            | 25-48               |
| 2  | 0-6                | Y            | V     | V    | V     | TREX1    | c.341G>A       | p.Arg114His                 | p            | c.592G>A      | p.Glu198Lys                 | p            | 0-12                |
| 3  | 0-6                | N            | V     | V    | V     | TREX1    | c.341G>A       | p.Arg114His                 | p            | c.416delC     | p.Ala139Valfs*21            | p            | 49-72               |
| 4  | 0-6                | Y            | V     | V    | V     | TREX1    | NA             | p.Ala194fs                  | p            | c.506G>A      | p.Arg169His (p.Arg114His)   | p            | 0-12                |
| 5  | 0-6                | Y            | V     | V    | V     | TREX1    | c.341G>A       | p.Arg114His                 | p            | c.341G>A      | p.Arg114His                 | p            | 49-72               |
| 6  | NA                 | N            | NA    | NA   | NA    | TREX1    | c.52G>C        | p.Asp18His                  | p            | –             | –                           | –            | >120                |
| 7  | 0-6                | N            | V     | V    | V     | TREX1    | c.341G>A       | p.Arg114His                 | p            | c.667G>A      | p.Ala223Thr                 | LP           | 25-48               |
| 8  | 0-6                | Y            | V     | V    | V     | TREX1    | c.553G>A       | p.Asp185Asn                 | LP           | c.1079A>G     | p.Tyr360Cys                 | LP           | 13-24               |
| 9  | 0-6                | Y            | V     | V    | V     | TREX1    | c.341G>A       | p.Arg114His                 | p            | c.907A>C      | p.Thr303Pro                 | LP           | >120                |
| 10 | 0-6                | Y            | V     | V    | V     | TREX1    | c.341G>A       | p.Arg114His                 | p            | c.341G>A      | p.Arg114His                 | p            | 0-12                |
| 11 | 0-6                | Y            | V     | V    | V     | TREX1    | c.341G>A       | p.Arg114His                 | p            | c.341G>A      | p.Arg114His                 | p            | 25-48               |
| 12 | 0-6                | N            | V     | V    | V     | TREX1    | c.655C>T       | p.Arg219*                   | p            | c.779C>T      | p.Leu260Pro                 | VUS/LP       | 49-72               |
| 13 | 0-6                | Y            | V     | V    | V     | TREX1    | c.457_458insA  | p.Gln153fs                  | p            | c.457_458insA | p.Gln153fs                  | p            | 0-12                |
| 14 | 0-6                | Y            | V     | V    | V     | TREX1    | c.341G>A       | p.Arg114His                 | p            | c.667G>A      | p.Ala223Thr                 | LP           | 25-48               |
| 15 | 0-6                | Y            | V     | V    | V     | TREX1    | c.341G>A       | p.Arg114His                 | p            | c.341G>A      | p.Arg114His                 | p            | 0-12                |
| 16 | 0-6                | Y            | V     | V    | V     | TREX1    | c.341G>A       | p.Arg114His                 | p            | c.341G>A      | p.Arg114His                 | p            | 73-96               |
| 17 | 0-6                | Y            | V     | V    | V     | TREX1    | c.262insAG     | p.Ser88Lysfs*               | p            | c.290G>A      | p.Arg97His                  | LP           | >120                |
| 18 | NA                 | Y            | V     | V    | V     | RNASEH2B | c.179T>G       | p.Leu60Arg                  | LP/P         | c.529G>A      | p.Ala177Thr                 | p            | 97-120              |
| 19 | 7-12               | N            | V     | V    | V     | RNASEH2B | c.529G>A       | p.Ala177Thr                 | P            | c.529G>A      | p.Ala177Thr                 | P            | >120                |
| 20 | 7-12               | N            | V     | V    | V     | RNASEH2B | c.529G>A       | p.Ala177Thr                 | P            | c.529G>A      | p.Ala177Thr                 | P            | >120                |
| 21 | 0-6                | Y            | V     | V    | V     | RNASEH2B | c.136ivs+1delG | –                           | P            | c.529G>A      | p.Ala177Thr                 | P            | >120                |
| 22 | 0-6                | Y            | V     | V    | V     | RNASEH2B | c.136ivs+1delG | –                           | P            | c.529G>A      | p.Ala177Thr                 | P            | >120                |

Table 2. Clinical and Genetic Details of the Cohort.

|    |       |    |     |     |     |              |                         |                 |    |                                |             |    |        |
|----|-------|----|-----|-----|-----|--------------|-------------------------|-----------------|----|--------------------------------|-------------|----|--------|
| 23 | 0-6   | N  | V   | II  | III | RNASEH2<br>B | c.529G>A                | p.Ala177Thr     | P  | c.128C>A                       | p.Pro43His  | LP | 97-120 |
| 24 | 0-6   | N  | V   | NA  | NA  | RNASEH2<br>B | c.488C>T                | p.Thr163Ile     | p  | c.2T>C<br>(Initiator<br>Codon) | -           | P  | 13-24  |
| 25 | 0-6   | N  | V   | V   | V   | RNASEH2<br>B | c.529G>A                | p.Ala177Thr     | p  | c.529G>A                       | p.Ala177Thr | P  | 25-48  |
| 26 | 13-24 | N  | V   | III | IV  | RNASEH2<br>B | c.529G>A                | p.Ala177Thr     | p  | c.529G>A                       | p.Ala177Thr | P  | 49-72  |
| 27 | 0-6   | N  | V   | V   | V   | RNASEH2<br>B | c.529G>A                | p.Ala177Thr     | p  | c.529G>A                       | p.Ala177Thr | P  | 25-48  |
| 28 | 13-24 | NA | NA  | NA  | NA  | RNASEH2<br>B | c.529G>A                | p.Ala177Thr     | p  | c.529G>A                       | p.Ala177Thr | P  | 25-48  |
| 29 | 0-6   | Y  | I   | I   | I   | RNASEH2<br>B | c.529G>A                | p.Ala177Thr     | p  | c.529G>A                       | p.Ala177Thr | P  | 13-24  |
| 30 | 13-24 | N  | IV  | IV  | IV  | RNASEH2<br>B | c.529G>A                | p.Ala177Thr     | p  | c.510+1G>A                     | -           | P  | 13-24  |
| 31 | 13-24 | N  | V   | III | V   | RNASEH2<br>B | c.510+1G>A              | -               | p  | c.529G>A                       | p.Ala177Thr | P  | 13-24  |
| 32 | 6-12  | N  | II  | II  | II  | RNASEH2<br>B | c.132T>A                | p.Cys44*        | P  | c.529G>A                       | p.Ala177Thr | P  | 25-48  |
| 33 | 7-12  | N  | IV  | IV  | NA  | RNASEH2<br>B | c.529G>A                | p.Ala177Thr     | P  | c.529G>A                       | p.Ala177Thr | P  | 13-24  |
| 34 | 0-6   | Y  | V   | NA  | NA  | RNASEH2<br>B | c.132T>A                | p.Cys44*        | p  | c.529G>A                       | p.Ala177Thr | P  | 0-12   |
| 35 | 0-6   | Y  | V   | V   | V   | RNASEH2<br>B | c.428_434delA<br>GGAAAA | p.Glu144Valfs*5 | p  | c.529G>A                       | p.Ala177Thr | P  | 25-48  |
| 36 | 7-12  | N  | III | III | IV  | RNASEH2<br>B | c.128C>A                | p.Pro43His      | LP | c.529G>A                       | p.Ala177Thr | P  | 25-48  |
| 37 | 0-6   | Y  | V   | V   | V   | RNASEH2<br>B | c.3G>A                  | p.Met1?         | p  | c.412C>T                       | p.Leu138Phe | LP | 25-48  |
| 38 | 0-6   | N  | V   | V   | V   | RNASEH2<br>B | c.529G>A                | p.Ala177Thr     | P  | c.488C>T                       | p.Thr163Ile | P  | 13-24  |
| 39 | 0-6   | N  | I   | I   | I   | RNASEH2<br>B | c.529G>A                | p.Ala177Thr     | P  | c.529G>A                       | p.Ala177Thr | P  | >120   |
| 40 | 0-6   | Y  | V   | V   | V   | RNASEH2<br>B | c.529G>A                | p.Ala177Thr     | P  | Exon 2-5<br>deletion           | -           | P  | 97-120 |
| 41 | 0-6   | Y  | V   | V   | V   | RNASEH2<br>B | c.529G>A                | p.Ala177Thr     | P  | c.488C>T                       | p.Thr163Ile | P  | >120   |
| 42 | 0-6   | Y  | V   | V   | V   | RNASEH2<br>B | c.529G>A                | p.Ala177Thr     | P  | c.488C>T                       | p.Thr163Ile | P  | >120   |
| 43 | 0-6   | N  | V   | V   | V   | RNASEH2<br>B | c.529G>A                | p.Ala177Thr     | P  | c.529G>A                       | p.Ala177Thr | P  | >120   |

Table 2. Clinical and Genetic Details of the Cohort.

|    |       |   |     |     |     |              |                                 |             |        |                                     |             |        |        |
|----|-------|---|-----|-----|-----|--------------|---------------------------------|-------------|--------|-------------------------------------|-------------|--------|--------|
| 44 | 0-6   | Y | V   | V   | V   | RNASEH2<br>B | c.529G>A                        | p.Ala177Thr | P      | c.529G>A                            | p.Ala177Thr | P      | >120   |
| 45 | 0-6   | N | IV  | IV  | III | RNASEH2<br>B | c.529G>A                        | p.Ala177Thr | P      | c.529G>A                            | p.Ala177Thr | P      | >120   |
| 46 | 0-6   | N | V   | V   | IV  | RNASEH2<br>B | c.529G>A                        | p.Ala177Thr | P      | c.529G>A                            | p.Ala177Thr | P      | >120   |
| 47 | 0-6   | Y | V   | V   | V   | RNASEH2<br>B | c.529G>A                        | p.Ala177Thr | p      | c.488C>T                            | p.Thr163Ile | P      | >120   |
| 48 | 0-6   | Y | V   | V   | V   | RNASEH2<br>B | c.529G>A                        | p.Ala177Thr | P      | c.3G>A                              | p.Met1?     | P      | >120   |
| 49 | 0-6   | Y | V   | V   | V   | RNASEH2<br>B | c.554T>G                        | p.Val185Gly | LP/P   | c.554T>G                            | p.Val185Gly | LP/P   | 25-48  |
| 50 | 0-6   | Y | V   | V   | V   | RNASEH2<br>B | c.529G>A                        | p.Ala177Thr | P      | c.529G>A                            | p.Ala177Thr | P      | 97-120 |
| 51 | 7-12  | N | V   | IV  | III | RNASEH2<br>B | c.529G>A                        | p.Ala177Thr | P      | c.529G>A                            | p.Ala177Thr | P      | 25-48  |
| 52 | 13-24 | N | V   | V   | V   | RNASEH2<br>B | c.529G>A                        | p.Ala177Thr | P      | c.529G>A                            | p.Ala177Thr | P      | 25-48  |
| 53 | 0-6   | N | V   | V   | V   | RNASEH2<br>A | c.703C>T                        | p.Arg235Trp | VUS/LP | c.869A>G                            | p.Glu290Gly | VUS/LP | 49-72  |
| 54 | 0-6   | Y | V   | V   | V   | RNASEH2<br>A | c.622C>T                        | p.Ser208Pro | VUS/LP | c.622C>T                            | p.Ser208Pro | VUS/LP | 13-24  |
| 55 | 7-12  | N | IV  | III | IV  | RNASEH2<br>A | c.557G>A                        | p.Arg186Gln | LP     | c.557G>A                            | p.Arg186Gln | LP     | 25-48  |
| 56 | 0-6   | N | III | III | I   | RNASEH2<br>A | c.152A>G                        | p.Tyr51Cys  | VUS/LP | c.746C>T                            | p.Ala249Val | VUS/LP | 25-48  |
| 57 | 0-6   | Y | III | IV  | V   | RNASEH2<br>A | c.623C>T                        | p.Ser208Leu | VUS    | c.760T>C                            | p.Trp254Arg | VUS    | 25-48  |
| 58 | 0-6   | Y | V   | V   | V   | RNASEH2<br>C | c.451C>T                        | p.Pro151Ser | P      | c.450G>A                            | p.Trp150*   | P      | 25-48  |
| 59 | 0-6   | y | NA  | NA  | NA  | RNASEH2<br>C | c.472C>G                        | p.His158Asp | VUS    | c.155T>G                            | p.Ile52Ser  | VUS    | 0-12   |
| 60 | 0-6   | Y | V   | V   | V   | SAMHD1       | Exon 1 deletion                 | –           |        | C.1456A>T                           | p.Lys186*   | P/LP   | 0-12   |
| 61 | 0-6   | Y | V   | V   | V   | SAMHD1       | c.490C>T                        | p.Arg164*   | P/LP   | 5.80kb exon 1<br>deletion           | –           |        | 13-24  |
| 62 | 0-6   | Y | V   | V   | V   | SAMHD1       | chr20:35,578,2<br>04-35,583,998 | –           |        | chr20:35,578,<br>204-<br>35,583,998 | –           |        | >120   |
| 63 | 7-12  | N | I   | I   | I   | SAMHD1       | chr20:35,578,2<br>04-35,583,998 | –           |        | chr20:35,578,<br>204-<br>35,583,998 | –           |        | >120   |
| 64 | 0-6   | Y | V   | V   | V   | SAMHD1       | Exon 1 deletion                 | –           |        | c.676C>G                            | p.Arg226Gly | VUS/LP | 0-12   |
| 65 | 7-12  | N | I   | I   | I   | SAMHD1       | Exon 1 deletion                 | –           |        | Exon 1<br>deletion                  | –           |        | >120   |

Table 2. Clinical and Genetic Details of the Cohort.

|    |       |    |     |     |     |        |                      |                 |        |                      |                  |      |        |
|----|-------|----|-----|-----|-----|--------|----------------------|-----------------|--------|----------------------|------------------|------|--------|
| 66 | >24   | N  | I   | I   | I   | SAMHD1 | Exon 1 deletion      | -               |        | Exon 1 deletion      | -                |      | >120   |
| 67 | 0-6   | N  | I   | I   | I   | SAMHD1 | 5 prime end deletion | -               |        | 5 prime end deletion | -                |      | >120   |
| 68 | 0-6   | N  | IV  | II  | II  | SAMHD1 | c.602T>A             | p.Ile201Asn     | LP/P   | c.1293A>T            | p.Leu431Phe      | VUS  | 73-96  |
| 69 | 0-6   | Y  | V   | V   | V   | SAMHD1 | c.1321dupG           | p.Ala441Glyfs*9 | LP     | c.1343T>C            | p.Ile448Thr      | LP   | 13-24  |
| 70 | 7-12  | Y  | IV  | III | IV  | SAMHD1 | c.1657T>G            | p.Tyr553Asp     | VUS    | c.464A>G             | p.Tyr155Cys      | VUS  | 49-72  |
| 71 | 0-6   | Y  | V   | V   | IV  | SAMHD1 | c.1153A>G            | p.Met385Val     | P      | c.1153A>G            | p.Met385Val      | P    | 73-96  |
| 72 | NA    | Y  | V   | V   | V   | ADAR1  | c.3019G>A            | p.Gly1007Arg    | p      | -                    | -                | -    | 97-120 |
| 73 | 7-12  | NA | NA  | NA  | NA  | ADAR1  | c.556C>T             | p.Gln186*       | p      | c.577C>G             | p.Pro193Ala      | P    | 73-96  |
| 74 | 13-24 | Y  | V   | IV  | V   | ADAR1  | c.982C>T             | p.Arg328*       | p      | c.577C>G             | p.Pro193Ala      | P    | 49-72  |
| 75 | 13-24 | N  | IV  | III | III | ADAR1  | c.577 C>G            | p.Pro193Ala     | p      | c.3020-3C>G          | IVS11-3C>G       | LP   | >120   |
| 76 | 0-6   | Y  | IV  | IV  | IV  | ADAR1  | c.3019G>A            | p.Gly1007Arg    | p      | -                    | -                | -    | 25-48  |
| 77 | 13-24 | N  | III | III | II  | ADAR1  | c.3019G>C            | p.Gly1007Arg    | p      | -                    | -                | -    | 49-72  |
| 78 | 0-6   | N  | V   | V   | IV  | ADAR1  | c.3577G>A            | p.Glu1193Lys    | LP     | c.1493_1494delAG     | p.Glu498Valfs*18 | P    | 49-72  |
| 79 | 13-24 | N  | V   | V   | V   | ADAR1  | c.3019G>A            | p.Gly1007Arg    | p      | -                    | -                | -    | >120   |
| 80 | 0-6   | Y  | V   | V   | V   | ADAR1  | c.3019G>A            | p.Gly1007Arg    | p      | -                    | -                | -    | 97-120 |
| 81 | >24   | N  | I   | I   | I   | ADAR1  | c.3443+1G>C          | -               | LP     | c.577C>G             | p.Pro193Ala      | P    | 73-96  |
| 82 | 0-6   | Y  | V   | V   | V   | ADAR1  | c.577C>G             | p.Pro193Ala     | p      | c.2675G>A            | p.Arg892His      | P/LP | 0-12   |
| 83 | 7-12  | N  | III | II  | II  | ADAR1  | c.3019G>A            | p.Gly1007Arg    | P      | c.2653G>A            | p.Val885Ile      | LP   | 25-48  |
| 84 | 0-6   | N  | I   | NA  | NA  | ADAR1  | c.3019G>A            | p.Gly1007Arg    | P      | c.2653G>A            | p.Val885Ile      | LP   | 0-12   |
| 85 | 0-6   | Y  | V   | V   | V   | ADAR1  | c.577C>G             | p.Pro193Ala     | P      | c. 2608 G>A          | p.Ala870Thr      | P/LP | 97-120 |
| 86 | 7-12  | Y  | V   | V   | V   | ADAR1  | c.577G>T             | p.Pro193Ala     | P      | c.1076_1080delAGCGA  | p.Lys359Argfs    | P/LP | 97-120 |
| 87 | 7-12  | Y  | V   | V   | V   | IFIH1  | c.1009A>G            | p.Arg337Gly     | p      | -                    | -                | -    | >120   |
| 88 | 0-6   | N  | V   | V   | IV  | IFIH1  | c.2342G>A            | p.Gly781Glu     | VUS/LP | -                    | -                | -    | 49-72  |
| 89 | 7-12  | Y  | V   | V   | V   | IFIH1  | c.2159G>A            | p.Arg720Gln     | p      | -                    | -                | -    | 97-120 |

Table 2. Clinical and Genetic Details of the Cohort.

|     |       |   |     |     |     |       |            |             |        |   |   |   |        |
|-----|-------|---|-----|-----|-----|-------|------------|-------------|--------|---|---|---|--------|
| 90  | 0-6   | Y | IV  | V   | V   | IFIH1 | c.2335C>T  | p.Arg779Cys | P      | - | - | - | 49-72  |
| 91  | 0-6   | N | V   | V   | V   | IFIH1 | c.2336G>T  | p.Arg779Leu | LP     | - | - | - | 49-72  |
| 92  | 0-6   | Y | V   | V   | V   | IFIH1 | c.2159 G>A | p.Arg270Gln | VUS/LP | - | - | - | 97-120 |
| 93  | 0-6   | N | III | II  | III | IFIH1 | c.2336G>A  | p.Arg779His | P      | - | - | - | 25-48  |
| 94  | >24   | N | I   | I   | I   | IFIH1 | c.2335C>T  | p.Arg779Cys | P      | - | - | - | 97-120 |
| 95  | 0-6   | Y | V   | V   | V   | IFIH1 | c.2936T>G  | p.Leu979Trp | LP     | - | - | - | 0-12   |
| 96  | 13-24 | N | I   | I   | I   | IFIH1 | c.2336G>A  | p.Arg779His | P      | - | - | - | 49-72  |
| 97  | 13-24 | N | I   | I   | I   | IFIH1 | c.2336G>A  | p.Arg779His | P      | - | - | - | 25-48  |
| 98  | 0-6   | N | V   | V   | V   | IFIH1 | c.2407A>T  | p.Ile803Phe | VUS    | - | - | - | 13-24  |
| 99  | 7-12  | N | V   | IV  | II  | IFIH1 | c.2471G>A  | p.Arg824Lys | VUS/LP | - | - | - | >120   |
| 100 | 13-24 | N | VI  | III | I   | IFIH1 | c.2561T>A  | p.Met854Lys | VUS/LP | - | - | - | >120   |

Abbreviations: CFCS, Communication Function Classification System; GMFCS, Gross Motor Function Classification System; LP, likely pathogenic; MACS, Manual Ability Classification System; P, pathogenic; VUS, variant of unknown significance.
